# Supplementary material for: Gezondheid en welbevinden van oudere migranten in Nederland: Een narratieve literatuurstudie
Source: Springer Nature journal article supplement (doi:10.1007/s12439-018-0268-2), 2018-11-12
Supplement: MOESM1 [file 16267776]

|  | **Thema** | **Auteurs** | **Titel** | **Jaar** | **Publicatie in/door** | **Type onderzoek** |
| --- | --- | --- | --- | --- | --- | --- |
| 1 | Gezondheidsstatus | M.B. Snijder, H. Galenkamp, M. Prins, E.M. Derks, R.J.G. Peters, A.H. Zwinderman, K. Stronks | Cohort profile: the Healthy Life in an Urban Setting (HELIUS) study in Amsterdam, the Netherlands | 2017 | BMJ Open | kwantitatief en bio-bank |
| 2 | Gezondheidsstatus, zorggebruik, mantelzorg, zorgverlening, wonen | H. Leyerzapf, S.S. Klokgieters, H. Ghorashi, M. Broese van Groenou | Kleurrijke zorg: Een verkennende literatuurstudie naar culturele en seksuele diversiteit in de langdurige ouderenzorg | 2017 | VU, VUMC | rapport literatuuroverzicht |
| 3 | Gezondheidsstatus, sociale participatie, eenzaamheid, wonen | F. El Fakiri, J. Bouwman-Notenboom | Gezondheid van oudere migranten in de vier grote steden | 2016 | GGD Amsterdam | kwantitatief |
| 4 | Gezondheid, zorggebruik | I. Wolffers, A. van der Kwaak, N. van Beelen | Culturele diversiteit in de gezondheidszorg: Kennis, attitude en vaardigheden | 2013 | Coutinho | boek |
| 5 | Gezondheidsstatus | U.Z. Ikram, A.E. Kunst, M. Lamkaddem, K. Stronks | The disease burden across different ethnic groups in Amsterdam, the Netherlands, 2011–2030 | 2013 | The European Journal of Public Health | kwantitatief |
| 6 | Gezondheidsstatus | A.E. Kunst, J.P. Mackenbach, M. Lamkaddem, J. Rademakers, W. Devillé | Overzicht en evaluatie van resultaten van wetenschappelijk onderzoek naar etnische verschillen in gezondheid, gezondheidsrisico’s en zorggebruik in Nederland | 2008 | Erasmus MC, NIVEL | kwantitatief, rapport |
| 7 | Gezondheidsstatus | I. Stirbu, A.E. Kunst, F.A. Vlems, O. Visser, V. Bos, W. Deville, H.G.J. Nijhuis, J.W. Coebergh | Cancer mortality rates among first and second generation migrants in the Netherlands: Convergence toward the rates of the native Dutch population | 2006 | International Journal of Cancer | kwantitatief |
| 8 | Gezondheidsstatus, zorggebruik | E.C. Poort, J. Spijker, H. Dijkshoorn, A.P. Verhoeff | Turkse en Marokkaanse ouderen in Amsterdam 1999-2000 | 2001 | GGD Amsterdam | rapport |
| 9 | Gezondheidsstatus | F.B. van der Wurff, A.T.F. Beekman, H. Dijkshoorn, J.A. Spijker, C.H.M. Smits, M.L. Stek, A. Verhoeff | Prevalence and risk-factors for depression in elderly Turkish and Moroccan migrants in the Netherlands | 2004 | Journal of Affective Disorders | kwantitatief |
| 10 | Gezondheidsstatus | H. P.Uniken Venema, H. F.L Garretsen, P.J. Van Der Maas | Health of migrants and migrant health policy, the Netherlands as an example | 1995 | Social Science and Medicine | kwantitatief |
| 11 | Gezondheid, levensverwachting | M. Reus‑Pons, E. U.B. Kibele, F. Janssen | Differences in healthy life expectancy between older migrants and non-migrants in three European countries over time | 2017 | International Journal of Public Health | kwantitatief |
| 12 | Gezondheid transitie | M. Reus-Pons, C. Mulder, E.U.B. Kibele, F. Janssen | Differences in the health transition patterns of migrants and non-migrants aged 50 and older in southern and western Europe (2004–2015) | 2018 | BMC Medicine | kwantitatief |
| 13 | Gezondheid, kwaliteit van leven (HRQOL) | I. Verhagen, W. J.G. Ros, B. Steunenberg, N.J. de Wit | Ethnicity does not account for differences in the health-related quality of life of Turkish, Moroccan, and Moluccan elderly in the Netherlands | 2014 | Health and Quality of Life Outcomes | kwantitatief |
| 14 | Gezondheid, medicijnengebruik | S. Denktas, G. Koopmans, E. Birnie, M. Foets, G. Bonsel | Underutilization of prescribed drugs use among first generation elderly immigrants in the Netherlands | 2010 | BMC Health Services Research | kwantitatief |
| 15 | Gezondheidsstatus, dementie | J. Parlevliet, Ö. Uysal-Bozkir, M. Goudsmit, J. van Campen, R. Kok, G. ter Riet, B. Schmand, S. de Rooij | Cognitieve achteruitgang bij oudere migranten | 2018 | Huisarts en Wetenschap | kwantitatief |
| 16 | Gezondheid, dementie | N. van Wezel, A.L. Francke, E. Kayan-Acun, W.L.J.M. Deville, N.J. van Grondelle, M.M. Blom | Explanatory models and openness about dementia in migrant communities: A qualitative study among female family carers | 2016 | Dementia | kwalitatief |
| 17 | Gezondheidsstatus, mentaal | C.H.M. Smits, M.C. Seeleman, L.P. van Buren, C. Yuen | Psychische gezondheid bij oudere Chinese migranten: een onderzoeksverkenning | 2006 | Tijdschrift voor Gezondheidswetenschappen | kwalitatief |
| 18 | Gezondheid, mentaal | B.U. Ince, T. Fassaert, M. de Wit, P. Cuijpers, J. Smot, J. Ruwaard, H. Rijper | The relationship between acculturation strategies and depressive and anxiety disorders in Turkish migrants in the Netherlands | 2014 | BMC Psychiatry | kwantitatief |
| 19 | Gezondheidsstatus, mentaal | M.A.S. de Wit, W.C. Tuinebreijer, J. Dekker, A.J.T.F. Beekman, W.H.M. Gorissen A.C. Schrier, B.W.J.H. Penninx, I.H. Komproe, A.P. Verhoeff | Depressive and anxiety disorders in different ethnic groups: A population based study among native Dutch, and Turkish, Moroccan and Surinamese migrants in Amsterdam | 2008 | Social Psychiatry and Psychiatric Epidemiology | kwantitatief |
| 20 | Gezondheid meten, dementie | M. Goudsmit, Ö. Uysal-Bozkir, J.L. Parlevliet, J.P.C.M. van Campen, S.E. de Rooij & B. Schmand | The Cross-Cultural Dementia Screening (CCD): A new neuropsychological screening instrument for dementia in elderly immigrants | 2017 | Journal of Clinical and Experimental Neuropsychology | kwantitatief |
| 21 | Gezondheid meten, dementie | J. Parlevliet, Ö. Uysal-Bozkir, M. Goudsmit, J. van Campen, B. Schmand, S. de Rooij | The SYMBOL Study: A population-based study on health and cognition in immigrant older adults in the Netherlands | 2014 | Journal of Gerontology & Geriatric Research | kwantitatief |
| 22 | Gezondheid meten | C. Agyemang, S. Denktas, M. Bruijnzeels, M. Foets | Validity of the single-item question on self-rated health status in first generation Turkish and Moroccans versus native Dutch in the Netherlands | 2006 | Public Health | kwantitatief |
| 23 | Zorggebruik, mantelzorg | C. Verstappen, J. van den Broeke | Samen zorgen voor oudere migranten: Transitie van familie naar gedeelde zorg | 2018 | Geron | essay |
| 24 | Zorggebruik | A. Sekercan, A.J. Woudstra, R.J.G. Peters, M. Lamkaddem, M.S. Akgun, M.L. Essink-Bot | Dutch citizens of Turkish origin who utilize healthcare services in Turkey: A qualitative study on motives and contextual factors | 2018 | BMC Health Services Research | kwalitatief |
| 25 | Zorggebruik | J. Suurmond, D.L. Rosenmöller, H. el Mesbahi, M. Lamkaddem, M.L. Essink-Bot | Barriers in access to home care services among ethnic minority and Dutch elderly - A qualitative study | 2016 | International Journal of Nursing Studies | kwalitatief |
| 26 | Zorggebruik | F.G.M. Hazeleger, H. Dijkshoorn, M. Buster, I.M. de Jong, S. Cremer | Verschillen in thuiszorggebruik onder Amsterdamse ouderen | 2016 | Tijdschrift voor Gezondheidswetenschappen | kwantitatief |
| 27 | Zorggebruik | A. Sekercan, M. Lamkaddem, M.B. Snijder, R.J. Peters, M.L. Essink-Bot | Healthcare consumption by ethnic minority people in their country of origin | 2015 | European Journal of Public Health | kwantitatief |
| 28 | Zorggebruik | I. Verhagen, W.J.G. Ros, B. Steunenberg, W. Laan, N.J. de Wit | Differences in health care utilisation between elderly from ethnic minorities and ethnic Dutch elderly | 2014 | International Journal for Equity in Health | kwantitatief |
| 29 | Zorggebruik | T. Fassaert, A.E. Hesselink, A.P. Verhoeff | Acculturation and use of health care services by Turkish and Moroccan migrants: A cross-sectional population-based study | 2009 | BMC Public Health | kwantitatief |
| 30 | Zorggebruik | F.M. de Graaf, A.L. Francke | Barriers to home care for terminally ill Turkish and Moroccan migrants, perceived by GPs and nurses: A survey | 2009 | BMC Palliative Care | kwantitatief |
| 31 | Zorggebruik | K. Hosper | Oudere migranten en huisartsbezoek: Correcter medicatiegebruik door betere taalbeheersing | 2009 | Phaxx | essay |
| 32 | Zorggebruik | K. Stronks, I. Kulu-Glasgow, C. Agyemang | The utility of 'country of birth' for the classification of ethnic groups in health research: The Dutch experience | 2009 | Ethnicity & Helath | kwantitatief |
| 33 | Zorggebruik | S. Denktaş, G. Koopmans, E. Birnie, M. Foets, G. Bonsel | Ethnic background and differences in health care use: A national cross-sectional study of native Dutch and immigrant elderly in the Netherlands | 2009 | International Journal for Equity in Health | kwantitatief |
| 34 | Zorggebruik | I. Burger | Zijn de care-voorzieningen klaar voor de groeiende groep Turkse en Marokkaanse ouderen in den Haag? Een literatuurverkenning | 2008 | Epidemiologisch Bulletin | rapport overzicht |
| 35 | Zorggebruik | J. Suurmond, C. Seeleman | Shared decision-making in an intercultural context: Barriers in the interaction between physicians and immigrant patients | 2006 | Patient Education and Counseling | kwalitatief |
| 36 | Zorggebruik | E. Uiters,  W.L. Devillé, M. Foets, P.P. Groenewegen | Validity of the single-item question on self-rated health status in first generation Turkish and Moroccans versus native Dutch in the Netherlands | 2006 | European Journal of Public Health | kwantitatief |
| 37 | Zorggebruik | H.M. Smeets, C.C. Ros | Zorggebruik door Marokkanen en Turken vergeleken met autochtone Nederlanders: Geen hogere zorgconsumptie en lagere geneesmiddelkosten | 2004 | Nederlands Tijdschrift voor Geneeskunde | kwantitatief |
| 38 | Zorggebruik | E.C. Poort, J. Spijker, H. Dijkshoorn, S.A. Reijneveld | Zelfredzaamheid en zorggebruik van de eerste generatie Turkse en Marokkaanse migrantenouderen | 2003 | Tijdschrift voor Gezondheidswetenschappen | kwantitatief |
| 39 | Zorggebruik | F.M. de Graaf, A.L. Francke | Zorg voor Turkse en Marokkaanse ouderen in Nederland, een literatuurstudie naar zorgbehoeften en zorggebruik | 2002 | Verpleegkunde | essay |
| 40 | Zorggebruik, initiatief | I. Verhagen | Community health workers: Bridging the gap between health needs of immigrant elderly and health- and welfare services in the Netherlands | 2015 | Utrecht University | proefschrift |
| 41 | Zorggebruik, initiatief | I. Verhagen, W.J.G. Ros, B. Steunenberg, N.J. de Wit | Culturally sensitive care for elderly immigrants through ethnic community health workers: Design and development of a community based interventions programme in the Netherlands | 2013 | BMC Public Health | quasi-experimenteel design, kwalitatief |
| 42 | Zorggebruik, initiatief | B. Steunenberg, I. Verhagen, W.J. Ros, N.J. de Wit | Op weg naar cultuur-sensitieve zorg voor oudere migranten! Opzet en werkwijze van het Stem van de Oudere Migrant project | 2014 | Tijdschrift voor Gerontologie en Geriatrie | kwalitatief, quasi-experimenteel |
| 43 | Zorggebruik, initiatief | C. Hoffer, B. Boekhout, J. ter Braak, Z. Gökce, M. Posthumus, Y. Zijlstra | Het migrantenproject van GGZ Noord-Holland-Noord: De vermeende onbereikbaarheid van allochtone ouderen doorbroken | 2010 | Dialoog | essay |
| 44 | Zorggebruik, initiatief | C. Hoffer | Neem niet aan, maar vraag!' Interculturele communicatie in de gezondheidszorg | 2010 | Phaxx | kwalitatief |
| 45 | Zorgkwaliteit | H. Kosec | Kwaliteit van zorg vanuit het perspectief van gebruikers: Aanknopingspunten voor het vergroten van de respons bij CQI metingen | 2015 | Pharos | quasi-experimenteel, rapport |
| 46 | Zorgkwaliteit | F. van Rosse, M.L. Essink-Bot, K. Stronks, M.de Bruijne, C. Wagner | Ethnic minority patients not at increased risk of adverse events during hospitalisation in urban hospitals in the Netherlands: Results of a prospective observational study | 2014 | BMJ Open | kwantitatief |
| 47 | Zorgkwaliteit | J. Suurmond, E. Uiters, M. de Bruijne, K. Stronks, M.L. Essink-bot | Negative health care experiences of immigrant patients: A qualitative study | 2011 | BMC Health Services Research | kwalitatief |
| 48 | Zorgkwaliteit | F.M. de Graaff, A.L. Francke, M.E. van den Muijsenbergh, S. van der Geest | 'Palliative care': A contradiction in terms? A qualitative study of cancer patients with a Turkish or Moroccan background, their relatives and care providers | 2010 | [BMC Palliative Care](https://www.ncbi.nlm.nih.gov/pubmed/20831777) | kwalitatief |
| 49 | Zorgkwaliteit | J. De Jong, M. Lamkaddem | Huisartsenzorg in cijfers: Moet een huisarts rekening houden met culturele en religieuze opvattingen? | 2008 | Huisarts en Wetenschap | essay |
| 50 | Zorggebruik, zorgkwaliteit | F.M. de Graaf, A.L. Francke | Home care for terminally ill Turks and Moroccans and their families in the Netherlands: Carers’ experiences and factors influencing ease of access and use of services | 2003 | International Journal of Nursing Studies | kwalitatief |
| 51 | Zorgverlening | J. van Wiering | Wie zorgt voor oudere migranten? De rol van mantelzorgers, sleutelfiguren, professionals, gemeenten en ouderen zelf | 2014 | Pharos | rapport |
| 52 | Gezondheid | M. Fransen, C. Harris, M.L. Essink-Bot | Beperkte gezondheidsvaardigheden bij patiënten van allochtone herkomst: Alleen een tolk inzetten is meestal niet genoeg | 2103 | Nederlands Tijdschrift Geneeskunde | essay |
| 53 | Veerkracht | S.S. Klokgieters, T.G. van Tilburg, D.J.H. Deeg, M. Huisman | Resilience in the disabling effect of gait speed among older Turkish and Moroccan immigrants and native Dutch | 2018 | Journal of Aging and Health | kwantitatief |
| 54 | Veerkracht | S.S. Klokgieters, T.G. van Tilburg, D.J.H. Deeg, M. Huisman | Do religious activities among young–old immigrants act as a buffer against the effect of a lack of resources on well-being? | 2018 | Aging and Mental Health | kwantitatief |
| 55 | Mantelzorg | A. de Boer | Wie maakt het verschil: Sociale ongelijkheid in condities en consequenties van informele hulp | 2017 | SCP, VU | rapport, kwantitatief |
| 56 | Mantelzorg, vrijwilligerswerk, politieke activiteiten, vertrouwen | W. Huijnk, I. Andriessen | Integratie in zicht? | 2016 | SCP | rapport |
| 57 | Mantelzorg | N. van Wezel, A.L. Francke, W.L.J.M. Deville, M.M. Blom, N.J. van Grondelle, E. Kayan-Acun | Family care for immigrants with Dementia: The perspective of female family careers living in the Netherlands | 2016 | Dementia | kwalitatief |
| 58 | Mantelzorg | M. de Klerk, A. de Boer, I. Plaisier, P. Schyns | Voor elkaar? | 2016 | SCP | rapport, kwantitatief |
| 59 | Mantelzorg | M. de Klerk, A. de Boer, I. Plaisier, P. Schyns, S. Kooiker | Informele hulp: Wie doet er wat? | 2015 | SCP | rapport |
| 60 | Mantelzorg | I. Yerden | Veranderingen in de zorg voor Turkse ouderen in de Nederlandse samenleving | 2014 | Geron | kwalitatief |
| 61 | Mantelzorg | M. van den Berg | Mantelzorg en etniciteit | 2014 | Universiteit Twente | proefschrift |
| 62 | Mantelzorg | I. Yerden | Tradities in de knel: Zorgverwachtingen en zorgpraktijk bij Turkse ouderen en hun kinderen in Nederland | 2013 | UvA | proefschrift |
| 63 | Mantelzorg | J.C.M. van Wiering, N.J. van Grondelle | Migrantenmantelzorgers: Onzichtbaar, onmisbaar… overbelast | 2013 | Bijblijven | kwalitatief |
| 64 | Mantelzorg | E. Tonkens, L. Verplanke, L. de Vries | Alleen slechte vrouwen klagen: Problemen en behoeften van geïsoleerde allochtone spilzorgers in Nederland | 2011 | UvA, Movisie | kwalitatief, rapport |
| 65 | Mantelzorg (wensen en behoeftes van mantelzorgers) | G. Kroese, M. von Meijenfeldt, S. Moerbeek | Zorgt u ook voor iemand? De positie van allochtone mantelzorgers en hun gebruik van ondersteuningsmogelijkheden in zes Nederlandse steden | 2011 | FORUM | rapport, kwalitatief en kwantitatief |
| 66 | Mantelzorg | I. Yerden | Maatschappelijke implicaties van de veelkleurige vergrijzing: Over allochtone ouderen en informele en formele zorg | 2010 | Tijdschrift voor Welzijnswerk | kwalitatief |
| 67 | Mantelzorg, intergenerationele solidariteit | H.A.G. de Valk, D. Schans | 'They ought to do this for their parents': Perceptions of filial obligations among immigrant and Dutch older people | 2008 | Ageing & Society | kwantitatief |
| 68 | Mantelzorg, intergenerationele solidariteit | D. Schans | Etnische diversiteit in intergenerationele solidariteit | 2007 | Utrecht University | proefschrift |
| 69 | Mantelzorg | L.P. van Buren, B. Hallich, M. Cleven, I.M.A. Joung, J. van Koutrik, I. Yerden | Mantelzorg in de Turkse cultuur: Zorg aan chronische zieke Turkse ouderen in Nederland | 2005 | GGD Rotterdam | rapport, kwalitatief |
| 70 | Intergenerationele solidariteit | I.N. Rooijackers | Migrant family matters. Comparing patterns of intergenerational solidarity and partner separation in the Netherlands | 2017 | Rijksuniversiteit Groningen | proefschrift |
| 71 | Transnationaal thuishorend | J. Klok, T.G. van Tilburg, B. Suanet, T. Fokkema | Transnational aging among older Turkish and Moroccan migrants in the Netherlands: Determinants of transnational behaviour and transnational belonging | 2017 | Transnational Social Review | kwantitatief |
| 72 | Demografisch profiel | T. Fokkema, N. Conkova | Turkse en Marokkaanse ouderen in Nederland en België : Een sociaal-demografisch profiel | 2018 | Geron | kwantitatief |
| 73 | Oud worden, zorg, wonen | Raad voor de Volksgezondheid en Zorg (RVZ) | Oud worden in Nederland: Een achtergrondstudie naar de visie van ouderen met een migratieachtergrond | 2012 | Achtergrondstudie in opdracht van de Raad voor de Volksgezondheid en Zorg | rapport |
| 74 | Zorg en wonen | I. Yerden | Wonen en zorg voor allochtone ouderen onder druk | 2011 | Contrast | kwalitatief |
| 75 | Gezondheid, zorggebruik, welzijn | M. den Draak, M. de Klerk | Oudere migranten: Kennis en kennislacunes | 2011 | SCP | rapport |
| 76 | Zorg- en woonwensen, participatie, mentaal welbevinden, sociale participatie | T.M. Meulenkamp, A.P.A. Van Beek, D.L. Gerritsen, F.M. de Graaff, A.L. Francke | Kwaliteit van leven bij migranten in de ouderenzorg | 2010 | NIVEL | kwalitatief, rapport |
| 77 | Gezondheid, sociale participatie | NOOM | Bagaimama-hoe gaat het? Een verkenning van kwetsbaarheid bij oudere migranten | 2009 | NOOM | kwalitatief |
| 78 | Zorg, wonen | R. Meijer, M. Boekenoogen | Allochtone ouderen in Amersfoort: Wonen, zorg, welzijn | 2006 | Gemeente Amersfoort | rapport |
| 79 | Ouder worden, gezondheid, zorggebruik | C. Hoffer | Allochtone ouderen: De onverwachte oude dag in Nederland | 2005 | GGZ Groep Europoort | rapport |
| 80 | Gezondheid, zorggebruik, informele zorg, participatie, wonen | R. Schellingerhout | Gezondheid en welzijn van allochtone ouderen | 2004 | SCP | kwantitatief, rapport |
| 81 | Zorg, gezondheid, mantelzorg, wonen | D. Kloosterboer | Wij komen er aan…Wensen, behoeften en ambities van oudere migranten in Nederland | 2004 | Dunya Advies | rapport |
| 82 | Wonen, zorg, welzijnsvoorzieninge, mantelzorg | D. Oudenampsen, M. de Gruijter | Woon-, zorg- en welzijn wensen van Marokkaanse ouderen: Vraaggericht werken aan voorzieningen voor Marokkaanse ouderen in Gouda en Schoonhoven | 2002 | Verwey-Jonker Instituut | kwalitatief, rapport |
| 83 | Beleving van ouder worden | J.M. Cramm, A. P. Nieboer | Positive ageing perceptions among migrant Turkish and native Dutch older people: A matter of culture or resources? | 2017 | BMC Geriatrics | kwantitatief |
| 84 | Betekenis van ouder worden | J. Omlo, M. Wolfers, B. Stam | Betekenis van het ouder worden onder Marokkaanse en Turkse ouderen | 2916 | Gemeente Rotterdam | kwalitatief |
| 85 | Beleving van ouder worden | C. Bode, C.H.C. Drossaert, E. Dijkstra | Een verkennende studie naar de eigen beleving van het ouder worden onder Turkse en Hindoestaans-Surinaamse ouderen in Den Haag | 2007 | Epidemiologisch Bulletin | kwantitatief en kwalitatief |
| 86 | Beleving van ouder worden | A. Clappers, M. Woutmeijer | Insjallah: De beleving van het ouder worden van Turkse en Marokkaanse ouderen | 2004 | Katholieke Universiteit Nijmegen | rapport |
| 87 | Beleving van ouder worden | J.K. Meyboom, W. van Eekelen | Yipratmak: Uitputten, verslijten, kapot maken | 1999 | Medische Antropologie | kwalitatief |
| 88 | Eenzaamheid | J. Klok, T.G. van Tilburg, B. Suanet, T. Fokkema, M. Huisman | National and transnational belonging among Turkish and Moroccan older migrants in the Netherlands: Protective against loneliness? | 2017 | European Journal of Ageing | kwantitatief |
| 89 | Eenzaamheid meten | Ö. Uysal-Bozkir, T. Fokkema, J.L. Mac-Neil-Vroomen, T.G. van Tilburg, S.E. de Rooij | Translation and validation of the De Jong Gierveld Loneliness Scale among older migrants living in the Netherlands | 2017 | The Journals of Gerontology: Series B | kwantitatief |
| 90 | Eenzaamheid | B. Steunenberg | Eenzaamheid bij oudere migranten | 2017 | Zorg voor de oudere migrant | essay |
| 91 | Eenzaamheid | Ö. Uysal-Bozkir | Health status of older migrants in the Netherlands: Cross-cultural validation of health scales | 2016 | Universiteit van Amsterdam | proefschrift |
| 92 | Eenzaamheid | T. Fokkema, S. Welschen, T.G. van Tilburg, F. Thomese | Eenzaamheid onder oudere migranten: Literatuur onderzoek en interviews | 2016 | Ben Sajetcentrum, VU | rapport |
| 93 | Participatie, vrijwilligerswerk | M. Gijsberts, T. van der Meer, J. Dagevos | 'Hunkering down' in multi-ethnic neighbourhoods? The effects of ethnic diversity on dimensions of social cohesion | 2012 | European Sociological Review | kwantitatief |
| 94 | Taal, welbevinden, participatie | A. Pot, M. Keijzer, K. de Bot | The language barrier in migrant aging | 2018 | International Journal of Bilingual Education and Bilingualism | kwalitatief en kwantitatief |
| 95 | Transnationaal wonen, pendelen | I. Yerden | Pendelen, wonen, zorg en welzijn: Transnationaal wonen van etnische ouderen | 2018 | Geron | essay |
| 96 | Woonwensen | N. Babel | Woonwensen van ouderen van Surinaamse afkomst | 2018 | Geron | essay, kwalitatief |
| 97 | Wonen en pendelen | I. Yerden | Transnationaal wonen van etnische ouderen: Pendelen, wonen, zorg en welzijn | 2017 | Instituut voor Maatschappelijke Veerkracht | rapport |
| 98 | Wonen | FORUM | Allochtone ouderen en wonen | 2016 | FORUM | rapport |
| 99 | Wonen | K. Penninx, Y. Witter | Verhalen van weerkracht: Oudere migranten aan het woord over gemeenschappelijk wonen, gezelligheid en gezondheid | 2013 | R.C. Maagdenhuis | boek |
| 100 | Wonen | Palet | Zelfstandig oud worden in Geeren-Zuid | 2011 | Palet | rapport |
| 101 | Wonen | J. Kullberg, M. Vervoort, J. Dagevos | Goede buren kan je niet kopen: Over de woonsituatie en woonpositie van niet-westerse allochtonen in Nederland | 2009 | SCP | rapport, kwalitatief |
| 102 | Wonen | G.M. de Gruijter, B. Tierolf, F. de Meer | Toekomstige woonbehoeften van oudere migranten in Eindhoven | 2008 | Verweij-Jonker Instituut | kwantitatief en kwalitatief |
| 103 | Wonen | E. de Jong | Bijzondere woonvormen in gewone woningen: Woongroepen van allochtone ouderen in Rotterdam | 2006 | Steunpunt Wonen | kwalitatief |
| 104 | Welbevinden | A.P. Nieboer, J.M. Cramm | How do older people achieve well-being? Validation of the Social Production Function Instrument for the level of well-being–short (SPF-ILs) | 2018 | Social Science & Medicine | kwantitatief |
